# Supplementary material
Source: PubMed Central journal article supplement (PMC7204567)
Supplement: tpmd190007.SD1.pdf [file tpmd190007.SD1.pdf]

**Supplemental Table 1. Unadjusted associations between psychological factors and quality of life - psychological factors are included in the model one at a time**

|                                                    | Physical |        |         | Psychological |        |         | Social   |        |         | Environment |        |         |
|----------------------------------------------------|----------|--------|---------|---------------|--------|---------|----------|--------|---------|-------------|--------|---------|
|                                                    | Estimate | StdErr | P-value | Estimate      | StdErr | P-value | Estimate | StdErr | P-value | Estimate    | StdErr | P-value |
| score depression                                   | -0.21    | 0.02   | <.0001  | -0.22         | 0.02   | <.0001  | -0.13    | 0.01   | <.0001  | -0.36       | 0.03   | <.0001  |
| score Anxiety                                      | -0.15    | 0.02   | <.0001  | -0.14         | 0.02   | <.0001  | -0.09    | 0.01   | <.0001  | -0.30       | 0.03   | <.0001  |
| score Disclosure1_<br>Responsibility               | -0.10    | 0.20   | 0.6174  | -0.20         | 0.20   | 0.2967  | -0.14    | 0.13   | 0.2515  | -0.32       | 0.33   | 0.3253  |
| score Disclosure2_<br>Instruction                  | -0.07    | 0.19   | 0.6969  | -0.08         | 0.18   | 0.6569  | -0.07    | 0.12   | 0.5586  | -0.30       | 0.31   | 0.3273  |
| score Disclosure3_<br>Relationship<br>Consequences | -0.29    | 0.12   | 0.0178  | -0.28         | 0.11   | 0.0154  | -0.11    | 0.07   | 0.1276  | -0.30       | 0.20   | 0.0076  |
| score Disclosure4_<br>Emotional<br>Release         | -0.24    | 0.18   | 0.1933  | -0.43         | 0.17   | 0.0133  | -0.25    | 0.11   | 0.0222  | -0.62       | 0.29   | 0.0349  |
| score Non-Disclosure                               | -0.04    | 0.06   | 0.5452  | -0.003        | -0.06  | 0.9550  | -0.03    | 0.04   | 0.3625  | -0.07       | 0.1    | 0.4724  |
| score Stigma                                       | -0.24    | 0.09   | 0.0061  | -0.25         | 0.08   | 0.0048  | -0.18    | 0.06   | 0.0012  | -0.40       | 0.14   | 0.0062  |

**Supplemental Table 2. Unadjusted associations between psychological factors and quality of life - psychological factors are included in the model simultaneously**

| Parameter            | Physical |        |         | Psychological |        |         | Social   |        |         | Environment |        |         |
|----------------------|----------|--------|---------|---------------|--------|---------|----------|--------|---------|-------------|--------|---------|
|                      | Estimate | StdErr | P-value | Estimate      | StdErr | P-value | Estimate | StdErr | P-value | Estimate    | StdErr | P-value |
| score_depression     | -0.18    | 0.02   | <.0001  | -0.20         | 0.02   | <.0001  | -0.11    | 0.01   | <.0001  | -0.27       | 0.04   | <.0001  |
| score_anxiety        | -0.04    | 0.02   | 0.0903  | -0.023        | 0.02   | 0.3415  | -0.02    | 0.01   | 0.1310  | -0.14       | 0.04   | 0.0006  |
| score_disclosure_1   | 0.10     | 0.24   | 0.6701  | 0.00          | 0.22   | 0.9877  | -0.06    | 0.15   | 0.6831  | 0.16        | 0.38   | 0.6622  |
| score_disclosure_2   | 0.08     | 0.22   | 0.7124  | 0.21          | 0.21   | 0.3013  | 0.09     | 0.14   | 0.5092  | 0.02        | 0.35   | 0.9484  |
| score_disclosure_3   | -0.15    | 0.12   | 0.2284  | -0.10         | 0.11   | 0.3802  | 0.03     | 0.07   | 0.7153  | -0.21       | 0.19   | 0.2753  |
| score_disclosure_4   | -0.04    | 0.19   | 0.8448  | -0.26         | 0.18   | 0.1417  | -0.15    | 0.12   | 0.2082  | -0.26       | 0.30   | 0.3829  |
| score_non disclosure | -0.00    | 0.06   | 0.9998  | 0.04          | 0.07   | 0.4685  | -0.01    | 0.04   | 0.6891  | -0.00       | 0.10   | 0.9618  |
| score_stigma         | -0.14    | 0.08   | 0.0993  | -0.13         | 0.08   | 0.0871  | -0.10    | 0.05   | 0.0450  | -0.19       | 0.13-  | 0.1513  |

### Supplemental Table 3. Associations between psychological factors and quality of life - psychological factors by years of diagnosis

#### (a) Physical

|                      | Years of Diagnose |        |         |           |        |         | Interaction P-value |
|----------------------|-------------------|--------|---------|-----------|--------|---------|---------------------|
|                      | ≤ 9 years         |        |         | > 9 years |        |         |                     |
|                      | Estimate          | StdErr | P-value | Estimate  | StdErr | P-value |                     |
| score_depression     | -0.19             | 0.03   | <0.0001 | -0.20     | 0.03   | <0.0001 | 0.6521              |
| score_anxiety        | -0.12             | 0.03   | 0.0001  | -0.21     | 0.04   | <0.0001 | 0.4471              |
| score_disclosure_1   | -0.51             | 0.23   | 0.0646  | 0.37      | 0.30   | 0.2209  | 0.0132              |
| score_disclosure_2   | -0.42             | 0.26   | 0.1036  | 0.35      | 0.29   | 0.2223  | 0.0208              |
| score_disclosure_3   | -0.33             | 0.14   | 0.0187  | -0.18     | 0.25   | 0.4795  | 0.6287              |
| score_disclosure_4   | -0.58             | 0.24   | 0.0185  | 0.17      | 0.27   | 0.5449  | 0.0591              |
| score_non disclosure | -0.009            | 0.09   | 0.9186  | -0.07     | 0.09   | 0.4463  | 0.1723              |
| score_stigma         | -0.33             | 0.12   | 0.0078  | -0.16     | 0.13   | 0.2301  | 0.0366              |

Adjusting for age, sex, education (college and above vs. high school vs. middle school and below), medical insurance, liver cirrhosis, other chronic disease, and stage

#### (b) Psychological

|                      | Years of Diagnose |        |         |           |        |         | Interaction P-value |
|----------------------|-------------------|--------|---------|-----------|--------|---------|---------------------|
|                      | ≤ 9 years         |        |         | > 9 years |        |         |                     |
|                      | Estimate          | StdErr | P-value | Estimate  | StdErr | P-value |                     |
| score_depression     | -0.20             | 0.03   | <0.0001 | -0.25     | 0.03   | <0.0001 | 0.3770              |
| score_anxiety        | -0.11             | 0.03   | 0.0002  | -0.18     | 0.03   | <0.0001 | 0.5919              |
| score_disclosure_1   | -0.50             | 0.28   | 0.0737  | 0.14      | 0.28   | 0.6122  | 0.0979              |
| score_disclosure_2   | -0.35             | 0.26   | 0.1750  | 0.25      | 0.27   | 0.3490  | 0.0410              |
| score_disclosure_3   | -0.30             | 0.14   | 0.0311  | -0.22     | 0.23   | 0.3346  | 0.8043              |
| score_disclosure_4   | -0.73             | 0.24   | 0.0026  | -0.06     | 0.25   | 0.8077  | 0.0866              |
| score_non disclosure | 0.02              | 0.09   | 0.8681  | -0.02     | 0.09   | 0.7968  | 0.1699              |
| score_stigma         | -0.32             | 0.12   | 0.0091  | -0.16     | 0.12   | 0.1819  | 0.0438              |

Adjusting for age, sex, education (college and above vs. high school vs. middle school and below), medical insurance, liver cirrhosis, other chronic disease, and stage

#### (c) Social

|                      | Years of Diagnose |        |         |           |        |         | Interaction P-value |
|----------------------|-------------------|--------|---------|-----------|--------|---------|---------------------|
|                      | ≤ 9 years         |        |         | > 9 years |        |         |                     |
|                      | Estimate          | StdErr | P-value | Estimate  | StdErr | P-value |                     |
| score_depression     | -0.12             | 0.02   | <0.0001 | -0.14     | 0.02   | <0.0001 | 0.6266              |
| score_anxiety        | -0.07             | 0.02   | 0.0007  | -0.12     | 0.02   | <0.0001 | 0.5078              |
| score_disclosure_1   | -0.44             | 0.19   | 0.0187  | 0.22      | 0.17   | 0.2033  | 0.0383              |
| score_disclosure_2   | -0.30             | 0.17   | 0.0877  | 0.21      | 0.16   | 0.1903  | 0.0346              |
| score_disclosure_3   | -0.15             | 0.10   | 0.1208  | 0.02      | 0.14   | 0.8734  | 0.8745              |
| score_disclosure_4   | -0.48             | 0.16   | 0.0039  | 0.03      | 0.15   | 0.8236  | 0.0211              |
| score_non disclosure | 0.01              | 0.06   | 0.8326  | -0.09     | 0.05   | 0.0960  | 0.0611              |
| score_stigma         | -0.23             | 0.08   | 0.0056  | -0.13     | 0.07   | 0.0801  | 0.2282              |

Adjusting for age, sex, education (college and above vs. high school vs. middle school and below), medical insurance, liver cirrhosis, other chronic disease, and stage

#### (d) Environment

|                      | Years of Diagnose |        |         |           |        |         | Interaction P-value |
|----------------------|-------------------|--------|---------|-----------|--------|---------|---------------------|
|                      | ≤ 9 years         |        |         | > 9 years |        |         |                     |
|                      | Estimate          | StdErr | P-value | Estimate  | StdErr | P-value |                     |
| score_depression     | -0.34             | 0.05   | <0.0001 | -0.39     | 0.04   | <0.0001 | 0.6105              |
| score_anxiety        | -0.25             | 0.05   | <0.0001 | -0.39     | 0.05   | <0.0001 | 0.2520              |
| score_disclosure_1   | -1.12             | 0.48   | 0.0197  | 0.64      | 0.45   | 0.1610  | 0.0100              |
| score_disclosure_2   | -0.98             | 0.44   | 0.0267  | 0.54      | 0.43   | 0.2104  | 0.0079              |
| score_disclosure_3   | -0.62             | 0.24   | 0.0108  | -0.19     | 0.38   | 0.6198  | 0.8242              |
| score_disclosure_4   | -1.17             | 0.41   | 0.0005  | 0.45      | 0.41   | 0.2677  | 0.0004              |
| score_non disclosure | -0.01             | 0.16   | 0.9369  | -0.14     | 0.14   | 0.3520  | 0.0778              |
| score_stigma         | -0.50             | 0.21   | 0.0201  | -0.30     | 0.20   | 0.1328  | 0.1504              |

Adjusting for age, sex, education (college and above vs. high school vs. middle school and below), medical insurance, liver cirrhosis, other chronic disease, and stage

## Supplemental Table 4. Associations between psychological factors and quality of life - psychological factors by comorbidities

### (a) Physical

|                      | Comorbidities |        |         |          |        |         | Interaction P-value |
|----------------------|---------------|--------|---------|----------|--------|---------|---------------------|
|                      | No            |        |         | Yes      |        |         |                     |
|                      | Estimate      | StdErr | P-value | Estimate | StdErr | P-value |                     |
| score_depression     | -0.23         | 0.03   | <0.0001 | -0.17    | 0.04   | <0.0001 | 0.3432              |
| score_anxiety        | -0.16         | 0.03   | <0.0001 | -0.12    | 0.04   | 0.0040  | 0.3681              |
| score_disclosure_1   | -0.05         | 0.24   | 0.8221  | -0.17    | 0.40   | 0.6770  | 0.7023              |
| score_disclosure_2   | 0.11          | 0.22   | 0.6233  | -0.54    | 0.38   | 0.1559  | 0.1183              |
| score_disclosure_3   | -0.27         | 0.13   | 0.0361  | -0.40    | 0.35   | 0.2585  | 0.5809              |
| score_disclosure_4   | 0.09          | 0.21   | 0.6546  | -0.86    | 0.36   | 0.0187  | 0.0801              |
| score_non disclosure | -0.05         | 0.07   | 0.4815  | -0.05    | 0.13   | 0.6889  | 0.5436              |
| score_stigma         | -0.29         | 0.10   | 0.0056  | -0.10    | 0.19   | 0.6040  | 0.4085              |

Adjusting for age, sex, education (college and above vs. high school vs. middle school and below), medical insurance, liver cirrhosis, stage, and years of diagnose

### (b) Psychological

|                      | Comorbidities |        |         |          |        |         | Interaction P-value |
|----------------------|---------------|--------|---------|----------|--------|---------|---------------------|
|                      | No            |        |         | Yes      |        |         |                     |
|                      | Estimate      | StdErr | P-value | Estimate | StdErr | P-value |                     |
| score_depression     | -0.23         | 0.02   | <0.0001 | -0.20    | 0.04   | <0.0001 | 0.7528              |
| score_anxiety        | -0.15         | 0.03   | <0.0001 | -0.10    | 0.04   | 0.0173  | 0.2369              |
| score_disclosure_1   | -0.03         | 0.22   | 0.8791  | -0.56    | 0.39   | 0.1624  | 0.2523              |
| score_disclosure_2   | 0.17          | 0.21   | 0.4070  | -0.72    | 0.37   | 0.0563  | 0.0408              |
| score_disclosure_3   | -0.23         | 0.12   | 0.0616  | -0.62    | 0.35   | 0.0772  | 0.1663              |
| score_disclosure_4   | -0.10         | 0.20   | 0.6197  | -1.07    | 0.35   | 0.0031  | 0.0647              |
| score_non disclosure | -0.004        | 0.07   | 0.9573  | -0.05    | 0.13   | 0.7150  | 0.8965              |
| score_stigma         | -0.28         | 0.10   | 0.0046  | -0.11    | 0.19   | 0.5542  | 0.3216              |

Adjusting for age, sex, education (college and above vs. high school vs. middle school and below), medical insurance, liver cirrhosis, stage, and years of diagnose

### (c) Social

|                      | Comorbidities |        |         |          |        |         | Interaction P-value |
|----------------------|---------------|--------|---------|----------|--------|---------|---------------------|
|                      | No            |        |         | Yes      |        |         |                     |
|                      | Estimate      | StdErr | P-value | Estimate | StdErr | P-value |                     |
| score_depression     | -0.13         | 0.02   | <0.0001 | -0.13    | 0.03   | <0.0001 | 0.9782              |
| score_anxiety        | -0.09         | 0.02   | <0.0001 | -0.08    | 0.03   | <0.0001 | 0.6750              |
| score_disclosure_1   | 0.02          | 0.14   | 0.9042  | -0.50    | 0.27   | 0.0626  | 0.0400              |
| score_disclosure_2   | 0.05          | 0.13   | 0.6991  | -0.38    | 0.26   | 0.1365  | 0.1400              |
| score_disclosure_3   | -0.07         | 0.08   | 0.3787  | -0.39    | 0.24   | 0.0985  | 0.0953              |
| score_disclosure_4   | -0.02         | 0.13   | 0.8929  | -0.71    | 0.24   | 0.0037  | 0.0178              |
| score_non disclosure | -0.02         | 0.04   | 0.5804  | -0.11    | 0.09   | 0.2415  | 0.6164              |
| score_stigma         | -0.19         | 0.06   | 0.0028  | -0.14    | 0.12   | 0.2736  | 0.6620              |

Adjusting for age, sex, education (college and above vs. high school vs. middle school and below), medical insurance, liver cirrhosis, stage, and years of diagnose

### (d) Environment

|                      | Comorbidities |        |         |          |        |         | Interaction P-value |
|----------------------|---------------|--------|---------|----------|--------|---------|---------------------|
|                      | No            |        |         | Yes      |        |         |                     |
|                      | Estimate      | StdErr | P-value | Estimate | StdErr | P-value |                     |
| score_depression     | -0.37         | 0.04   | <0.0001 | -0.33    | 0.07   | <0.0001 | 0.7535              |
| score_anxiety        | -0.31         | 0.04   | <0.0001 | -0.27    | 0.07   | 0.0003  | 0.4362              |
| score_disclosure_1   | -0.05         | 0.37   | 0.9024  | -0.92    | 0.70   | 0.1924  | 0.1714              |
| score_disclosure_2   | -0.02         | 0.34   | 0.9465  | -1.03    | 0.67   | 0.1259  | 0.1701              |
| score_disclosure_3   | -0.48         | 0.20   | 0.0148  | -0.75    | 0.63   | 0.2354  | 0.5104              |
| score_disclosure_4   | -0.07         | 0.33   | 0.8262  | -1.67    | 0.63   | 0.0096  | 0.0604              |
| score_non disclosure | -0.06         | 0.12   | 0.6056  | -0.20    | 0.24   | 0.3965  | 0.9941              |
| score_stigma         | -0.46         | 0.16   | 0.0043  | -0.16    | 0.33   | 0.6278  | 0.3224              |

Adjusting for age, sex, education (college and above vs. high school vs. middle school and below), medical insurance, liver cirrhosis, stage, and years of diagnose

## Supplemental Table 5. Associations between psychological factors and quality of life - psychological factors by stage of disease

### (a) Physical

|                      | Stage               |        |         |                         |        |         | Interaction P-value |
|----------------------|---------------------|--------|---------|-------------------------|--------|---------|---------------------|
|                      | Chronic hepatitis B |        |         | Cirrhosis and carcinoma |        |         |                     |
|                      | Estimate            | StdErr | P-value | Estimate                | StdErr | P-value |                     |
| score_depression     | -0.23               | 0.02   | <0.0001 | -0.12                   | 0.07   | 0.0760  | 0.2437              |
| score_anxiety        | -0.15               | 0.02   | <0.0001 | -0.11                   | 0.07   | 0.1443  | 0.7285              |
| score_disclosure_1   | -0.05               | 0.21   | 0.8154  | -1.22                   | 0.97   | 0.2221  | 0.2032              |
| score_disclosure_2   | -0.06               | 0.20   | 0.7816  | -0.43                   | 0.78   | 0.5894  | 0.4256              |
| score_disclosure_3   | -0.29               | 0.12   | 0.0227  | -0.64                   | 0.68   | 0.3515  | 0.8635              |
| score_disclosure_4   | -0.24               | 0.19   | 0.1938  | -0.57                   | 0.87   | 0.5166  | 0.9862              |
| score_non disclosure | -0.04               | 0.07   | 0.5461  | -0.05                   | 0.25   | 0.8388  | 0.9051              |
| score_stigma         | -0.24               | 0.09   | 0.0113  | -0.36                   | 0.34   | 0.3101  | 0.7862              |

Adjusting for age, sex, education (college and above vs. high school vs. middle school and below), medical insurance, liver cirrhosis, other chronic disease, and years of diagnose

### (b) Psychological

|                      | Stage               |        |         |                         |        |         | Interaction P-value |
|----------------------|---------------------|--------|---------|-------------------------|--------|---------|---------------------|
|                      | Chronic hepatitis B |        |         | Cirrhosis and carcinoma |        |         |                     |
|                      | Estimate            | StdErr | P-value | Estimate                | StdErr | P-value |                     |
| score_depression     | -0.23               | 0.02   | <0.0001 | -0.16                   | 0.06   | 0.0193  | 0.4836              |
| score_anxiety        | -0.14               | 0.02   | <0.0001 | -0.09                   | 0.07   | 0.2296  | 0.6438              |
| score_disclosure_1   | -0.20               | 0.20   | 0.3075  | -0.006                  | 1.00   | 0.9950  | 0.8117              |
| score_disclosure_2   | -0.09               | 0.19   | 0.6221  | 0.02                    | 0.79   | 0.9792  | 0.9404              |
| score_disclosure_3   | -0.26               | 0.12   | 0.0268  | -1.26                   | 0.64   | 0.0631  | 0.2384              |
| score_disclosure_4   | -0.46               | 0.18   | 0.0097  | -0.70                   | 0.87   | 0.4261  | 0.8947              |
| score_non disclosure | 0.0007              | 0.06   | 0.9917  | -0.13                   | 0.25   | 0.6264  | 0.8596              |
| score_stigma         | -0.22               | 0.09   | 0.0156  | -0.58                   | 0.33   | 0.0952  | 0.3613              |

Adjusting for age, sex, education (college and above vs. high school vs. middle school and below), medical insurance, liver cirrhosis, other chronic disease, and years of diagnose

### (c) Social

|                      | Stage               |        |         |                         |        |         | Interaction P-value |
|----------------------|---------------------|--------|---------|-------------------------|--------|---------|---------------------|
|                      | Chronic hepatitis B |        |         | Cirrhosis and carcinoma |        |         |                     |
|                      | Estimate            | StdErr | P-value | Estimate                | StdErr | P-value |                     |
| score_depression     | -0.15               | 0.01   | <0.0001 | -0.04                   | 0.04   | 0.2659  | 0.0480              |
| score_anxiety        | -0.10               | 0.02   | <0.0001 | -0.004                  | 0.004  | 0.9342  | 0.0672              |
| score_disclosure_1   | -0.15               | 0.13   | 0.2591  | -0.05                   | 0.57   | 0.9334  | 0.8262              |
| score_disclosure_2   | -0.10               | 0.13   | 0.4086  | 0.43                    | 0.44   | 0.3392  | 0.4066              |
| score_disclosure_3   | -0.14               | 0.08   | 0.0731  | 0.54                    | 0.38   | 0.1730  | 0.0496              |
| score_disclosure_4   | -0.28               | 0.12   | 0.0180  | -0.15                   | 0.50   | 0.7642  | 0.4165              |
| score_non disclosure | -0.05               | 0.04   | 0.2322  | 0.14                    | 0.14   | 0.3305  | 0.1337              |
| score_stigma         | -0.18               | 0.06   | 0.0024  | -0.22                   | 0.20   | 0.2747  | 0.9071              |

Adjusting for age, sex, education (college and above vs. high school vs. middle school and below), medical insurance, liver cirrhosis, other chronic disease, and years of diagnose

### (d) Environment

|                      | Stage               |        |         |                         |        |         | Interaction P-value |
|----------------------|---------------------|--------|---------|-------------------------|--------|---------|---------------------|
|                      | Chronic hepatitis B |        |         | Cirrhosis and carcinoma |        |         |                     |
|                      | Estimate            | StdErr | P-value | Estimate                | StdErr | P-value |                     |
| score_depression     | -0.40               | 0.04   | <0.0001 | -0.06                   | 0.08   | 0.5177  | 0.0055              |
| score_anxiety        | -0.32               | 0.04   | <0.0001 | -0.15                   | 0.09   | 0.1103  | 0.2343              |
| score_disclosure_1   | -0.36               | 0.34   | 0.2954  | 0.98                    | 1.19   | 0.4204  | 0.3721              |
| score_disclosure_2   | -0.31               | 0.33   | 0.3418  | -0.34                   | 0.95   | 0.7224  | 0.7907              |
| score_disclosure_3   | -0.55               | 0.20   | 0.0074  | -0.60                   | 0.82   | 0.4775  | 0.7163              |
| score_disclosure_4   | -0.71               | 0.31   | 0.0215  | -0.42                   | 1.06   | 0.6919  | 0.4954              |
| score_non disclosure | -0.10               | 0.11   | 0.3841  | 0.11                    | 0.31   | 0.7278  | 0.4398              |
| score_stigma         | -0.39               | 0.15   | 0.0109  | -0.44                   | 0.41   | 0.2950  | 0.9453              |

## Supplemental Table 6. Associations between psychological factors and quality of life - psychological factors by Education Level

### (a) Physical

|                      | Education         |        |         |             |        |         |                         |        |         | Interaction<br>P-value |
|----------------------|-------------------|--------|---------|-------------|--------|---------|-------------------------|--------|---------|------------------------|
|                      | College and above |        |         | High school |        |         | Middle school and below |        |         |                        |
|                      | Estimate          | StdErr | P-value | Estimate    | StdErr | P-value | Estimate                | StdErr | P-value |                        |
| score_depression     | -0.25             | 0.04   | <0.0001 | -0.20       | 0.04   | <0.0001 | -0.16                   | 0.03   | <0.0001 | 0.1538                 |
| score_anxiety        | -0.19             | 0.04   | <0.0001 | -0.16       | 0.04   | 0.0002  | -0.08                   | 0.03   | 0.0167  | 0.0765                 |
| score_disclosure_1   | 0.13              | 0.34   | 0.7104  | -0.34       | 0.37   | 0.3633  | -0.07                   | 0.32   | 0.8184  | 0.3371                 |
| score_disclosure_2   | 0.06              | 0.33   | 0.8461  | -0.15       | 0.32   | 0.6469  | -0.12                   | 0.31   | 0.6777  | 0.5254                 |
| score_disclosure_3   | -0.20             | 0.28   | 0.4748  | -0.36       | 0.31   | 0.2500  | -0.27                   | 0.15   | 0.0643  | 0.8414                 |
| score_disclosure_4   | -0.03             | 0.31   | 0.9327  | -0.54       | 0.33   | 0.1056  | -0.25                   | 0.28   | 0.3782  | 0.4322                 |
| score_non disclosure | 0.0004            | 0.11   | 0.9676  | 0.07        | 0.11   | 0.5217  | -0.23                   | 0.11   | 0.0329  | 0.1229                 |
| score_stigma         | -0.44             | 0.14   | 0.0015  | -0.23       | 0.67   | 0.1034  | -0.07                   | 0.18   | 0.7067  | 0.2544                 |

Adjusting for age, sex, medical insurance, liver cirrhosis, other chronic disease, stage and years of diagnose

### (b) Psychological

|                      | Education         |        |         |             |        |         |                         |        |         | Interaction<br>P-value |
|----------------------|-------------------|--------|---------|-------------|--------|---------|-------------------------|--------|---------|------------------------|
|                      | College and above |        |         | High school |        |         | Middle school and below |        |         |                        |
|                      | Estimate          | StdErr | P-value | Estimate    | StdErr | P-value | Estimate                | StdErr | P-value |                        |
| score_depression     | -0.21             | 0.04   | <0.0001 | -0.22       | 0.04   | <0.0001 | -0.19                   | 0.03   | <0.0001 | 0.7383                 |
| score_anxiety        | -0.15             | 0.04   | <0.0001 | -0.17       | 0.04   | <0.0001 | -0.08                   | 0.03   | 0.0315  | 0.0614                 |
| score_disclosure_1   | 0.09              | 0.30   | 0.7771  | -0.47       | 0.36   | 0.1859  | -0.20                   | 0.32   | 0.5369  | 0.3363                 |
| score_disclosure_2   | -0.10             | 0.30   | 0.7302  | -0.19       | 0.32   | 0.5542  | 0.01                    | 0.31   | 0.9672  | 0.9337                 |
| score_disclosure_3   | -0.22             | 0.25   | 0.3734  | -0.41       | 0.30   | 0.1797  | -0.25                   | 0.15   | 0.0860  | 0.9389                 |
| score_disclosure_4   | -0.11             | 0.27   | 0.6797  | -0.82       | 0.32   | 0.0101  | -0.44                   | 0.28   | 0.1190  | 0.2418                 |
| score_non disclosure | 0.02              | 0.10   | 0.8645  | 0.06        | 0.10   | 0.5834  | -0.13                   | 0.11   | 0.2410  | 0.5059                 |
| score_stigma         | -0.40             | 0.12   | 0.0013  | -0.25       | 0.13   | 0.0648  | -0.08                   | 0.18   | 0.6791  | 0.2320                 |

Adjusting for age, sex, medical insurance, liver cirrhosis, other chronic disease, stage and years of diagnose

### (c) Social

|                      | Education         |        |         |             |        |         |                         |        |         | Interaction<br>P-value |
|----------------------|-------------------|--------|---------|-------------|--------|---------|-------------------------|--------|---------|------------------------|
|                      | College and above |        |         | High school |        |         | Middle school and below |        |         |                        |
|                      | Estimate          | StdErr | P-value | Estimate    | StdErr | P-value | Estimate                | StdErr | P-value |                        |
| score_depression     | -0.16             | 0.02   | <0.0001 | -0.13       | 0.02   | <0.0001 | -0.10                   | 0.02   | <0.0001 | 0.1645                 |
| score_anxiety        | -0.13             | 0.02   | <0.0001 | -0.12       | 0.02   | <0.0001 | -0.03                   | 0.02   | 0.1483  | 0.0024                 |
| score_disclosure_1   | 0.12              | 0.20   | 0.5492  | -0.51       | 0.22   | 0.0212  | -0.09                   | 0.22   | 0.6882  | 0.0557                 |
| score_disclosure_2   | 0.03              | 0.20   | 0.8911  | -0.10       | 0.20   | 0.6144  | -0.14                   | 0.21   | 0.5153  | 0.6371                 |
| score_disclosure_3   | -0.09             | 0.17   | 0.6065  | -0.09       | 0.19   | 0.6442  | -0.12                   | 0.10   | 0.2301  | 0.9767                 |
| score_disclosure_4   | -0.04             | 0.18   | 0.8359  | -0.30       | 0.20   | 0.1277  | -0.43                   | 0.19   | 0.0259  | 0.2848                 |
| score_non disclosure | -0.06             | 0.07   | 0.3842  | 0.06        | 0.06   | 0.3280  | -0.15                   | 0.07   | 0.0510  | 0.0563                 |
| score_stigma         | -0.31             | 0.08   | 0.0002  | -0.09       | 0.08   | 0.2711  | -0.17                   | 0.12   | 0.1633  | 0.2186                 |

Adjusting for age, sex, medical insurance, liver cirrhosis, other chronic disease, stage and years of diagnose

### (d) Environment

|                      | Education         |        |         |             |        |         |                         |        |         | Interaction<br>P-value |
|----------------------|-------------------|--------|---------|-------------|--------|---------|-------------------------|--------|---------|------------------------|
|                      | College and above |        |         | High school |        |         | Middle school and below |        |         |                        |
|                      | Estimate          | StdErr | P-value | Estimate    | StdErr | P-value | Estimate                | StdErr | P-value |                        |
| score_depression     | -0.39             | 0.06   | <0.0001 | -0.31       | 0.06   | <0.0001 | -0.29                   | 0.06   | <0.0001 | 0.4124                 |
| score_anxiety        | -0.34             | 0.06   | <0.0001 | -0.40       | 0.06   | <0.0001 | -0.16                   | 0.06   | 0.0069  | 0.0047                 |
| score_disclosure_1   | 0.40              | 0.52   | 0.4420  | -1.10       | 0.57   | 0.0533  | -0.27                   | 0.55   | 0.6294  | 0.0643                 |
| score_disclosure_2   | -0.15             | 0.51   | 0.7708  | -0.42       | 0.51   | 0.4107  | -0.36                   | 0.53   | 0.5002  | 0.7467                 |
| score_disclosure_3   | -0.31             | 0.43   | 0.4649  | -0.82       | 0.48   | 0.0918  | -0.48                   | 0.25   | 0.0576  | 0.7282                 |
| score_disclosure_4   | -0.09             | 0.47   | 0.8511  | -0.78       | 0.51   | 0.1289  | -0.97                   | 0.47   | 0.0424  | 0.3115                 |
| score_non disclosure | -0.12             | 0.17   | 0.4686  | 0.06        | 0.17   | 0.7364  | -0.26                   | 0.18   | 0.1573  | 0.3068                 |
| score_stigma         | -0.77             | 0.21   | 0.0003  | -0.24       | 0.21   | 0.2550  | -0.23                   | 0.31   | 0.4516  | 0.1355                 |

Adjusting for age, sex, medical insurance, liver cirrhosis, other chronic disease, stage and years of diagnose
